# Supplementary material for: Impact of Biometric Patient Data, Probiotic Supplementation, and Selected Gut Microorganisms on Calprotectin, Zonulin, and sIgA Concentrations in the Stool of Adults Aged 18–74 Years
Source: MDPI journal article supplement (doi:10.3390/biom12121781), 2022-11-29
Supplement: s1 [file s1]

# Impact of Biometric Patient Data, Probiotic Supplementation, and Selected Gut Microorganisms on Calprotectin, Zonulin, and sIgA Concentrations in the Stool of Adults Aged 18–74 Years

Magdalena Jendraszak <sup>1,\*</sup>, Mirosława Gałęcka <sup>2</sup>, Małgorzata Kotwicka <sup>1</sup>, Andreas Schwiertz <sup>3</sup>, Aleksandra Regdos <sup>2</sup>, Michalina Pazgrat-Patan <sup>2</sup> and Mirosław Andrusiewicz <sup>1,\*</sup>

<sup>1</sup> Chair and Department of Cell Biology, Poznan University of Medical Sciences, Rokietnicka 5D, 60-806 Poznań, Poland

<sup>2</sup> Institute of Microecology, Sielska 6, 60-129 Poznań, Poland

<sup>3</sup> Institute of Microecology, Auf den Luppen 8, 35745 Herborn, Germany

\* Correspondence: jendraszak@ump.edu.pl (M.J.); andrus@ump.edu.pl (M.A.)

## Supplementary tables

**Table S1.** Characteristics of the participants.

| Grouping variable |                     | N   | M     | SD    | Me    | Q1    | Q3    | p-value             |
|-------------------|---------------------|-----|-------|-------|-------|-------|-------|---------------------|
| Age               | -                   | 160 | 40    | 12.7  | 39    | 31    | 47    | -                   |
| Body mass [kg]    |                     | 138 | 69    | 15.9  | 66    | 58    | 78    |                     |
| BMI               |                     | 138 | 23.41 | 4.65  | 22.53 | 20.38 | 25.86 |                     |
| Sex               |                     |     |       |       |       |       |       |                     |
| Age               | female              | 111 | 41    | 13.1  | 39    | 31    | 48    | .3300 <sup>a</sup>  |
|                   | male                | 49  | 38    | 11.7  | 38    | 31    | 44    |                     |
| Body mass [kg]    | female              | 97  | 65    | 15.4  | 63    | 54    | 78    | <.0001 <sup>a</sup> |
|                   | male                | 41  | 79    | 12.8  | 75    | 70    | 90    |                     |
| BMI               | female              | 97  | 23.09 | 4.91  | 21.94 | 19.82 | 24.80 | .0413 <sup>a</sup>  |
|                   | male                | 41  | 24.17 | 3.91  | 23.89 | 21.22 | 26.86 |                     |
| Probiotics usage  |                     |     |       |       |       |       |       |                     |
| Age               | Non-supplementation | 62  | 39    | 11.3  | 38    | 31    | 44    | .6959 <sup>b</sup>  |
|                   | Supplementation     | 45  | 40    | 13.3  | 37    | 31    | 47    |                     |
| Body mass [kg]    | Non-supplementation | 59  | 71    | 17    | 70    | 58    | 86    | .1548 <sup>b</sup>  |
|                   | Supplementation     | 44  | 66    | 13    | 65    | 59    | 74    |                     |
| BMI               | Non-supplementation | 59  | 24.18 | 5.60  | 23.53 | 20.31 | 26.88 | .2627 <sup>a</sup>  |
|                   | Supplementation     | 44  | 22.29 | 3.37  | 22.36 | 20.06 | 24.55 |                     |
|                   | Present             | 86  | 23.10 | 4.149 | 22.44 | 20.38 | 25.61 |                     |

**Legend:** N – number of participants; M – Mean; SD – Standard deviation; Me – Median, Q1, Q3 – Lower and Upper Quartile; <sup>a</sup> – Mann-Whitney U test; <sup>b</sup> – t-Student test; p<0.05 are indicated in bold

**Table S2.** Biomarkers level characteristics in participants' stool.

| Marker                              | Grouping variable   | N  | M     | SD     | Me    | Q1    | Q3     | p-value                  |
|-------------------------------------|---------------------|----|-------|--------|-------|-------|--------|--------------------------|
| Calprotectin ug/g                   | -                   | 74 | 85    | 180.1  | 30    | 30    | 42     | -                        |
| slgA ug/ml                          |                     | 51 | 1702  | 1462   | 1399  | 549   | 2241   |                          |
| Zonulin ng/ml                       |                     | 80 | 85.53 | 63.27  | 71.70 | 48.19 | 102.95 |                          |
| Probiotics usage                    |                     |    |       |        |       |       |        |                          |
| Calprotectin µg/g                   | Non-supplementation | 29 | 100   | 232.6  | 30    | 30    | 35     | <.9999 <sup>a</sup>      |
|                                     | Supplementation     | 21 | 69    | 91.5   | 30    | 30    | 36     |                          |
| slgA µg/ml                          | Non-supplementation | 18 | 1917  | 1567.5 | 1868  | 914   | 2290   | <b>.0464<sup>b</sup></b> |
|                                     | Supplementation     | 13 | 990   | 690.2  | 686   | 494   | 1653   |                          |
| Zonulin ng/ml                       | Non-supplementation | 31 | 96.34 | 56.341 | 83.26 | 57.70 | 119.50 | .1819 <sup>a</sup>       |
|                                     | Supplementation     | 25 | 85.61 | 76.19  | 69.98 | 48.58 | 102.00 |                          |
| Gastrointestinal disorders presence |                     |    |       |        |       |       |        |                          |
| Calprotectin µg/g                   | Absent              | 18 | 109   | 197.4  | 32    | 30    | 107    | .0712 <sup>a</sup>       |
|                                     | Present             | 49 | 65    | 148.1  | 30    | 30    | 35     |                          |
| slgA µg/ml                          | Absent              | 20 | 1847  | 1486.3 | 1419  | 671   | 2274   | .3762 <sup>a</sup>       |
|                                     | Present             | 29 | 1567  | 1439.9 | 1305  | 442   | 2121   |                          |
| Zonulin ng/ml                       | Absent              | 35 | 81.05 | 52.853 | 68.49 | 45.39 | 86.90  | .6379 <sup>a</sup>       |
|                                     | Present             | 42 | 89.21 | 72.718 | 73.50 | 48.70 | 104.10 |                          |

**Legend:** N – number of participants; M – Mean; SD – Standard deviation; Me – Median, Q1, Q3 – Lower and Upper Quartile; <sup>a</sup> – Mann-Whitney U test; <sup>b</sup> – t-Student test;  $p < 0.05$  are indicated in bold

**Table S3.** Summary of analyzed microbiota characteristics regarding probiotic supplementation.

| Microbiota                                         | Probiotics          |         |         |         |        |         |                 |         |         |        |        |         | p-value <sup>a</sup> |
|----------------------------------------------------|---------------------|---------|---------|---------|--------|---------|-----------------|---------|---------|--------|--------|---------|----------------------|
|                                                    | Non-supplementation |         |         |         |        |         | Supplementation |         |         |        |        |         |                      |
|                                                    | N                   | M       | SD      | Me      | Q1     | Q3      | N               | M       | SD      | Me     | Q1     | Q3      |                      |
| <i>Escherichia coli</i>                            | 61                  | 2.16E7  | 4.03E7  | 4.00E6  | 8.00E5 | 3.00E7  | 45              | 2.14E7  | 4.46E7  | 4.00E6 | 1.00E6 | 1.00E7  | .8746                |
| <i>Escherichia coli</i> (NLF)                      | 62                  | 1.15E5  | 4.74E5  | 2.00E3  | 2.00E3 | 2.00E3  | 45              | 1.43E6  | 4.38E6  | 2.00E3 | 2.00E3 | 2.00E3  | <b>.0291</b>         |
| <i>Pseudomonas</i> spp.                            | 62                  | 5.19E3  | 2.51E4  | 2.00E3  | 2.00E3 | 2.00E3  | 44              | 2.01E4  | 8.66E4  | 2.00E3 | 2.00E3 | 2.00E3  | .4009                |
| <i>Klebsiella</i> spp.                             | 61                  | 3.41E5  | 1.47E6  | 2.00E3  | 2.00E3 | 2.00E3  | 45              | 2.73E5  | 1.32E6  | 2.00E3 | 2.00E3 | 2.00E3  | .2627                |
| <i>Enterobacter</i> spp.                           | 62                  | 6.33E5  | 1.76E6  | 2.00E3  | 2.00E3 | 2.00E3  | 45              | 1.08E5  | 4.22E5  | 2.00E3 | 2.00E3 | 2.00E3  | .9135                |
| <i>Citrobacter</i> spp.                            | 62                  | 1.70E5  | 1.27E6  | 2.00E3  | 2.00E3 | 2.00E3  | 45              | 1.56E6  | 6.64E6  | 2.00E3 | 2.00E3 | 2.00E3  | .1650                |
| <i>Enterococcus</i> spp.                           | 62                  | 3.36E7  | 1.18E8  | 2.00E3  | 2.00E3 | 8.00E5  | 45              | 4.18E7  | 1.15E8  | 2.00E3 | 2.00E3 | 6.00E6  | .7951                |
| <i>Bifidobacterium</i> spp.                        | 62                  | 1.04E9  | 9.37E8  | 8.00E8  | 4.00E8 | 1.00E9  | 45              | 8.77E8  | 9.67E8  | 6.00E8 | 2.00E8 | 1.00E9  | .6872                |
| <i>Bacteroides</i> spp.                            | 62                  | 2.39E9  | 2.02E9  | 2.00E9  | 1.00E9 | 3.00E9  | 45              | 2.24E9  | 1.64E9  | 2.00E9 | 1.00E9 | 3.00E9  | .2819                |
| <i>Lactobacillus</i> spp.                          | 62                  | 3.86E5  | 9.69E5  | 3.00E4  | 2.00E3 | 3.00E5  | 45              | 8.93E5  | 2.13E6  | 6.00E4 | 2.00E3 | 7.00E5  | .7050                |
| H <sub>2</sub> O <sub>2</sub> <i>Lactobacillus</i> | 62                  | 9.70E4  | 3.04E5  | 2.00E3  | 2.00E3 | 4.00E4  | 44              | 2.09E5  | 5.66E5  | 2.00E3 | 2.00E3 | 7.50E4  | .9246                |
| <i>Clostridium</i> spp.                            | 61                  | 1.77E4  | 4.91E4  | 2.00E3  | 2.00E3 | 2.00E3  | 45              | 7.36E4  | 2.26E5  | 2.00E3 | 2.00E3 | 2.00E3  | .1315                |
| <i>Faecalibacterium prausnitzii</i>                | 62                  | 4.57E9  | 3.69E9  | 3.00E9  | 2.00E9 | 7.00E9  | 45              | 5.24E9  | 4.45E9  | 4.00E9 | 2.00E9 | 8.00E9  | <.9999               |
| <i>Akkermansia muciniphila</i>                     | 62                  | 8.06E7  | 1.75E8  | 6.00E6  | 8.00E3 | 8.00E7  | 45              | 9.40E7  | 2.01E8  | 7.00E6 | 1.00E2 | 7.00E7  | .3422                |
| TBC                                                | 62                  | 1.38E10 | 1.42E10 | 1.00E10 | 5.00E9 | 2.00E10 | 45              | 1.03E10 | 1.06E10 | 7.00E9 | 4.00E9 | 1.00E10 | .7926                |
| <i>Candida</i> spp.                                | 62                  | 1.74E3  | 5.43E3  | 1.00E2  | 1.00E2 | 5.00E2  | 44              | 4.71E3  | 1.52E4  | 1.00E2 | 1.00E2 | 1.00E3  | .7037                |

**Legend:** N – number of participants; M – Mean; SD – Standard deviation; Me – Median, Q1, Q3 – Lower and Upper Quartile; <sup>a</sup> – Mann-Whitney U test; *p*<0.05 are indicated in bold

**Table S4.** Significant correlations between analyzed biomarkers and selected microorganisms in all studied cases.

| From                                               | To                                                 | R     | p-value          |
|----------------------------------------------------|----------------------------------------------------|-------|------------------|
| Calprotectin µg/g                                  | H <sub>2</sub> O <sub>2</sub> <i>Lactobacillus</i> | 0.25  | <b>.0343</b>     |
| Calprotectin µg/g                                  | <i>Bifidobacterium</i> spp.                        | 0.25  | <b>.0030</b>     |
| slgA µg/ml                                         | <i>Enterococcus</i> spp.                           | 0.28  | <b>.0447</b>     |
| slgA µg/ml                                         | <i>Citrobacter</i> spp.                            | -0.39 | <b>.0042</b>     |
| slgA µg/ml                                         | Calprotectin µg/g                                  | -0.60 | <b>.0085</b>     |
| Zonulin ng/ml                                      | <i>Lactobacillus</i> spp.                          | -0.27 | <b>.0145</b>     |
| <i>Bacteroides</i> spp.                            | TBC                                                | 0.58  | <b>&lt;.0001</b> |
| <i>Bacteroides</i> spp.                            | <i>Pseudomonas</i> spp.                            | 0.19  | <b>.0158</b>     |
| <i>Bacteroides</i> spp.                            | <i>Bifidobacterium</i> spp.                        | 0.36  | <b>&lt;.0001</b> |
| <i>Bifidobacterium</i> spp.                        | TBC                                                | 0.50  | <b>&lt;.0001</b> |
| <i>Candida</i> spp.                                | <i>Faecalibacterium prausnitzii</i>                | 0.18  | <b>.0232</b>     |
| <i>Candida</i> spp.                                | <i>Lactobacillus</i> spp.                          | 0.19  | <b>.0197</b>     |
| <i>Candida</i> spp.                                | H <sub>2</sub> O <sub>2</sub> <i>Lactobacillus</i> | 0.21  | <b>.0067</b>     |
| <i>Citrobacter</i> spp.                            | <i>Escherichia coli</i> (NLF)                      | 0.16  | <b>.0465</b>     |
| <i>Enterobacter</i> spp.                           | <i>Escherichia coli</i>                            | 0.16  | <b>.0391</b>     |
| <i>Enterococcus</i> spp.                           | <i>Citrobacter</i> spp.                            | 0.16  | <b>.0471</b>     |
| <i>Enterococcus</i> spp.                           | <i>Escherichia coli</i>                            | 0.16  | <b>.0454</b>     |
| <i>Escherichia coli</i>                            | <i>Escherichia coli</i> (NLF)                      | -0.17 | <b>.0319</b>     |
| <i>Faecalibacterium prausnitzii</i>                | <i>Bifidobacterium</i> spp.                        | 0.16  | <b>.0378</b>     |
| <i>Faecalibacterium prausnitzii</i>                | TBC                                                | 0.30  | <b>&lt;.0001</b> |
| H <sub>2</sub> O <sub>2</sub> <i>Lactobacillus</i> | <i>Escherichia coli</i> (NLF)                      | 0.22  | <b>.0052</b>     |
| H <sub>2</sub> O <sub>2</sub> <i>Lactobacillus</i> | <i>Bifidobacterium</i> spp.                        | 0.24  | <b>.0021</b>     |
| H <sub>2</sub> O <sub>2</sub> <i>Lactobacillus</i> | <i>Lactobacillus</i> spp.                          | 0.61  | <b>&lt;.0001</b> |
| <i>Lactobacillus</i> spp.                          | <i>Escherichia coli</i>                            | 0.18  | <b>.0249</b>     |
| <i>Lactobacillus</i> spp.                          | <i>Bifidobacterium</i> spp.                        | 0.22  | <b>.0048</b>     |
| <i>Lactobacillus</i> spp.                          | <i>Escherichia coli</i> (NLF)                      | 0.23  | <b>.0031</b>     |
| <i>Lactobacillus</i> spp.                          | <i>Enterococcus</i> spp.                           | 0.31  | <b>&lt;.0001</b> |
| <i>Lactobacillus</i> spp.                          | TBC                                                | 0.18  | <b>.0204</b>     |

**Legend:** R – Spearman's rank coefficient of correlation; TBC – total bacteria count; NLF – non-lactose fermenting; *p*<0.05 are indicated in bold

|                         |                                 |      |        |      |          |      |       |      |       |                |                                |      |      |          |      |        |      |             |   |
|-------------------------|---------------------------------|------|--------|------|----------|------|-------|------|-------|----------------|--------------------------------|------|------|----------|------|--------|------|-------------|---|
| R values ranges:        | -1                              | -0.8 | -0.79  | -0.6 | -0.59    | -0.4 | -0.39 | -0.2 | -0.19 | 0              | 0.19                           | 0.2  | 0.39 | 0.4      | 0.59 | 0.6    | 0.79 | 0.8         | 1 |
| Proportionality         | Negative/inversely proportional |      |        |      |          |      |       |      |       | No correlation | Positive/directly proportional |      |      |          |      |        |      |             |   |
| Strength Interpretation | very strong                     |      | strong |      | moderate |      | weak  |      |       | very weak      |                                | weak |      | moderate |      | strong |      | very strong |   |

**Table S5.** Significant correlations between analyzed biomarkers and selected microorganisms groups distinguished probiotics usage accordingly.

| Probiotics non-supplementation                     |                             |       |                  | Probiotics supplementation                         |                                                    |       |                  |
|----------------------------------------------------|-----------------------------|-------|------------------|----------------------------------------------------|----------------------------------------------------|-------|------------------|
| From                                               | To                          | R     | p-value          | From                                               | To                                                 | R     | p-value          |
| Calprotectin µg/g                                  | <i>Klebsiella</i> spp.      | 0.44  | <b>.0203</b>     | Calprotectin µg/g                                  | <i>Escherichia coli</i>                            | 0.43  | <b>.0496</b>     |
| Zonulin ng/ml                                      | <i>Lactobacillus</i> spp.   | -0.43 | <b>.0164</b>     | Calprotectin µg/g                                  | <i>Lactobacillus</i> spp.                          | 0.47  | <b>.0304</b>     |
| Zonulin ng/ml                                      | <i>Clostridium</i> spp.     | 0.36  | <b>.0468</b>     | Calprotectin µg/g                                  | H <sub>2</sub> O <sub>2</sub> <i>Lactobacillus</i> | 0.64  | <b>.0024</b>     |
| <i>Bacteroides</i> spp.                            | <i>Bifidobacterium</i> spp. | 0.51  | <b>&lt;.0001</b> | Zonulin ng/ml                                      | <i>Escherichia coli</i> (NLF)                      | 0.40  | <b>.0468</b>     |
| <i>Bacteroides</i> spp.                            | TBC                         | 0.67  | <b>&lt;.0001</b> | <i>Akkermansia muciniphila</i>                     | <i>Enterobacter</i> spp.                           | 0.37  | <b>.0114</b>     |
| <i>Candida</i> spp.                                | <i>Bacteroides</i> spp.     | 0.33  | <b>.0084</b>     | <i>Bacteroides</i> spp.                            | <i>Bifidobacterium</i> spp.                        | 0.37  | <b>.0127</b>     |
| <i>Candida</i> spp.                                | TBC                         | 0.28  | <b>.0294</b>     | <i>Bacteroides</i> spp.                            | TBC                                                | 0.62  | <b>&lt;.0001</b> |
| <i>Bifidobacterium</i> spp.                        | TBC                         | 0.57  | <b>&lt;.0001</b> | <i>Bifidobacterium</i> spp.                        | TBC                                                | 0.52  | <b>.0003</b>     |
| <i>Faecalibacterium prausnitzii</i>                | <i>Candida</i> spp.         | 0.34  | <b>.0066</b>     | <i>Candida</i> spp.                                | <i>Lactobacillus</i> spp.                          | 0.41  | <b>.0052</b>     |
| <i>Faecalibacterium prausnitzii</i>                | TBC                         | 0.39  | <b>.0019</b>     | <i>Candida</i> spp.                                | H <sub>2</sub> O <sub>2</sub> <i>Lactobacillus</i> | 0.45  | <b>.0027</b>     |
| H <sub>2</sub> O <sub>2</sub> <i>Lactobacillus</i> | <i>Lactobacillus</i> spp.   | 0.62  | <b>&lt;.0001</b> | <i>Escherichia coli</i> (NLF)                      | <i>Escherichia coli</i>                            | -0.40 | <b>.0068</b>     |
| <i>Lactobacillus</i> spp.                          | <i>Enterococcus</i> spp.    | 0.29  | <b>.0238</b>     | <i>Faecalibacterium prausnitzii</i>                | <i>Bifidobacterium</i> spp.                        | 0.34  | <b>.0234</b>     |
|                                                    |                             |       |                  | <i>Faecalibacterium prausnitzii</i>                | TBC                                                | 0.43  | <b>.0031</b>     |
|                                                    |                             |       |                  | H <sub>2</sub> O <sub>2</sub> <i>Lactobacillus</i> | <i>Lactobacillus</i> spp.                          | 0.62  | <b>&lt;.0001</b> |
|                                                    |                             |       |                  | <i>Lactobacillus</i> spp.                          | <i>Enterococcus</i> spp.                           | 0.33  | <b>.0262</b>     |
|                                                    |                             |       |                  | <i>Lactobacillus</i> spp.                          | <i>Bifidobacterium</i> spp.                        | 0.34  | <b>.0242</b>     |
|                                                    |                             |       |                  | <i>Lactobacillus</i> spp.                          | TBC                                                | 0.36  | <b>.0155</b>     |

**Legend:** R – Spearman's rank coefficient of correlation; TBC – total bacteria count; NLF – non-lactose fermenting;  $p < 0.05$  are indicated in bold

|                         |                                 |        |          |      |       |      |       |      |       |                |                                |          |        |             |      |     |      |     |   |
|-------------------------|---------------------------------|--------|----------|------|-------|------|-------|------|-------|----------------|--------------------------------|----------|--------|-------------|------|-----|------|-----|---|
| R values ranges:        | -1                              | -0.8   | -0.79    | -0.6 | -0.59 | -0.4 | -0.39 | -0.2 | -0.19 | 0              | 0.19                           | 0.2      | 0.39   | 0.4         | 0.59 | 0.6 | 0.79 | 0.8 | 1 |
| Proportionality         | Negative/inversely proportional |        |          |      |       |      |       |      |       | No correlation | Positive/directly proportional |          |        |             |      |     |      |     |   |
| Strength Interpretation | very strong                     | strong | moderate | weak |       |      |       |      |       | very weak      | weak                           | moderate | strong | very strong |      |     |      |     |   |
